# Supplementary material for: Amorphous titanate-crosslinking N-rich carbon hybrid with 3D channels for fast lithium storage
Source: Royal Society of Chemistry journal article supplement (doi:10.1039/c5ra03308j), 2015-01-01
Supplement: c5ra03308j1.pdf [file c5ra03308j1.pdf]

Electronic Supplementary Information for

## **Amorphous titanate-crosslinking N-rich carbon hybrid with 3D channels for fast lithium storage**

Jiehua Liu,<sup>a\*</sup> Jiaqi Xu<sup>a</sup>, Kuan Zhou<sup>a</sup>, Lei Wang<sup>b</sup> and Xiangfeng Wei<sup>ac</sup>

<sup>a</sup> School of Materials Science and Engineering, Hefei University of Technology, Tunxi Road No.193

Hefei, Anhui, 230009, China E-mail: [liujh@hfut.edu.cn](mailto:liujh@hfut.edu.cn)

<sup>b</sup> Department of Chemistry and Biochemistry, University of South Carolina, Columbia, SC 29208

United States

<sup>c</sup> School of Chemical Engineering, Hefei University of Technology, Tunxi Road No.193 Hefei,  
Anhui, 230009, China

### **1. Experiments**

Amorphous titanate-crosslinking N-rich carbon hybrid was synthesized by a facile one pot method including polymerization and then *in situ* carbonization at 500 and 650 °C respectively. In a typical route, 0.1 mol of tetrabutyl titanate and 0.5 mol of H<sub>2</sub>O were added into 0.4 mol of melamine in consequence with the aid of blender. The mixture was successively annealed under nitrogen at 200 °C for 1 hour, 500 °C for 2-5 hours, and 650 °C for 1-2 hour in order to remove n-butyl alcohol and H<sub>2</sub>O, C<sub>3</sub>N<sub>4</sub> polymerization, and *in situ* carbonization respectively. The as-obtained

amorphous titanate-crosslinking N-rich carbon hybrid appeared as a black powder.

XRD patterns were performed with a D/MAX2500V diffractometer with Cu-K $\alpha$  radiation ( $\lambda = 1.54056 \text{ \AA}$ ). TEM were obtained with JEOL 2100F. Elemental maps were collected using a JEM 2100F with a HAADF-STEM detector and an Oxford EDS. N<sub>2</sub> adsorption-desorption isotherms were conducted at 77 K on an ASAP2020 analyzer. X-ray photoelectron spectroscopic (XPS, ESCLAB250) measurements were carried out by using a monochromated Al K $\alpha$  X-ray source at power of 150 W.

Electrochemical tests were performed using two-electrode Swagelok-type cells with lithium serving as both the counter and reference electrodes under room temperature. The working electrode was composed of 80 wt.% of the active material, 10 wt.% of conductivity agent (carbon black, Super-P-Li), and 10 wt.% of binder (polyvinylidene difluoride, PVDF, Aldrich). The electrolyte used was 1 M LiPF<sub>6</sub> in a 1:1 (w/w) mixture of ethylene carbonate and diethyl carbonate. Cell assembly was carried out in an Argon-filled glove box. Galvanostatic charge/discharge cycling was conducted using a battery tester (NEWAER) at different current rates of 2.0 – 5.0 A g<sup>-1</sup>.

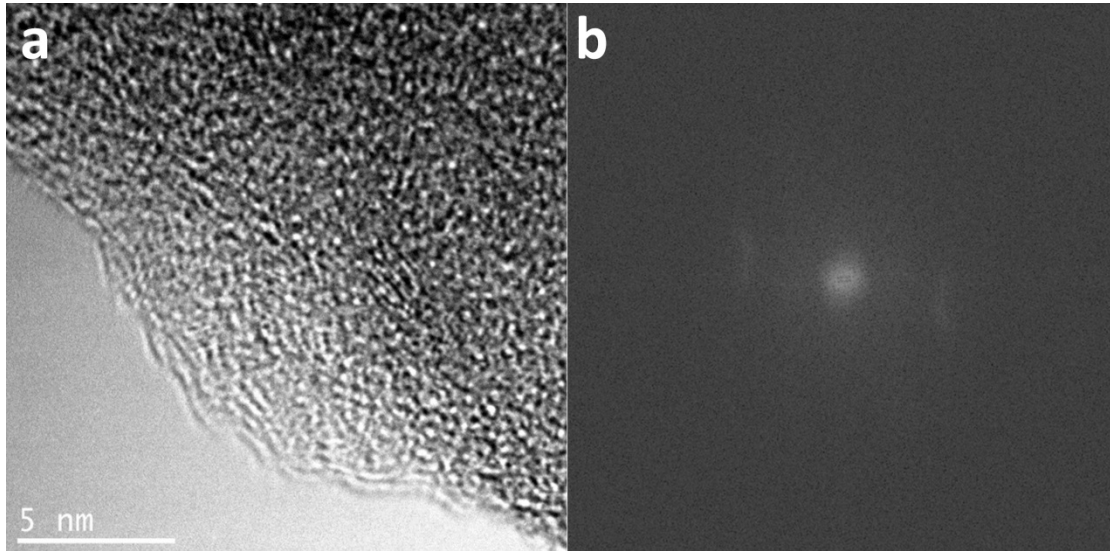

Fig. S1. HRTEM image (a) and its Fast Fourier Transform (FFT) image (b) of amorphous titanate-crosslinking N-rich carbon hybrid.

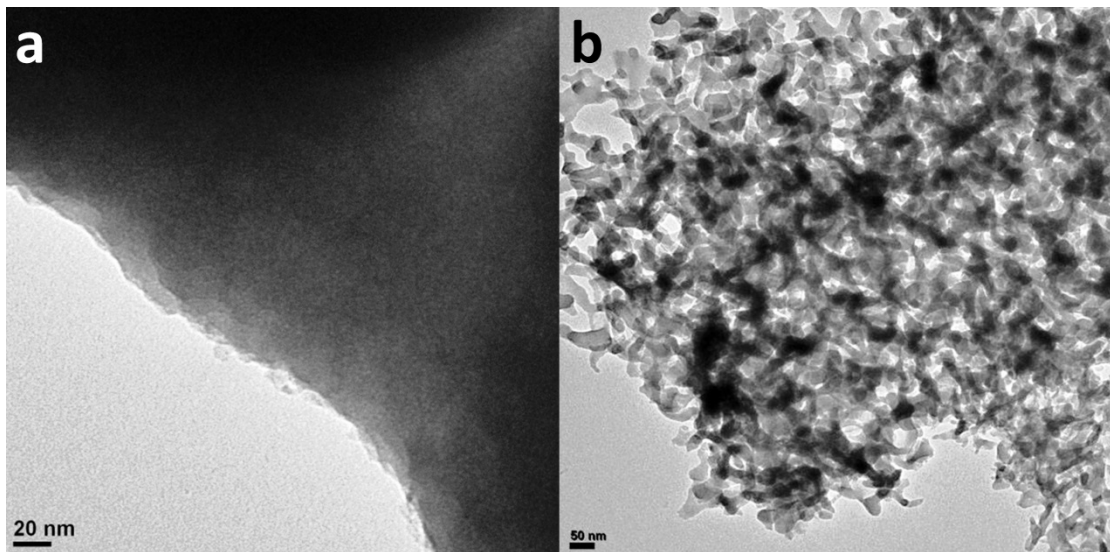

Fig. S2. TEM images of intermediates which annealed at 500 °C for 2 hours (a) and 650 °C for 1 hour (b).

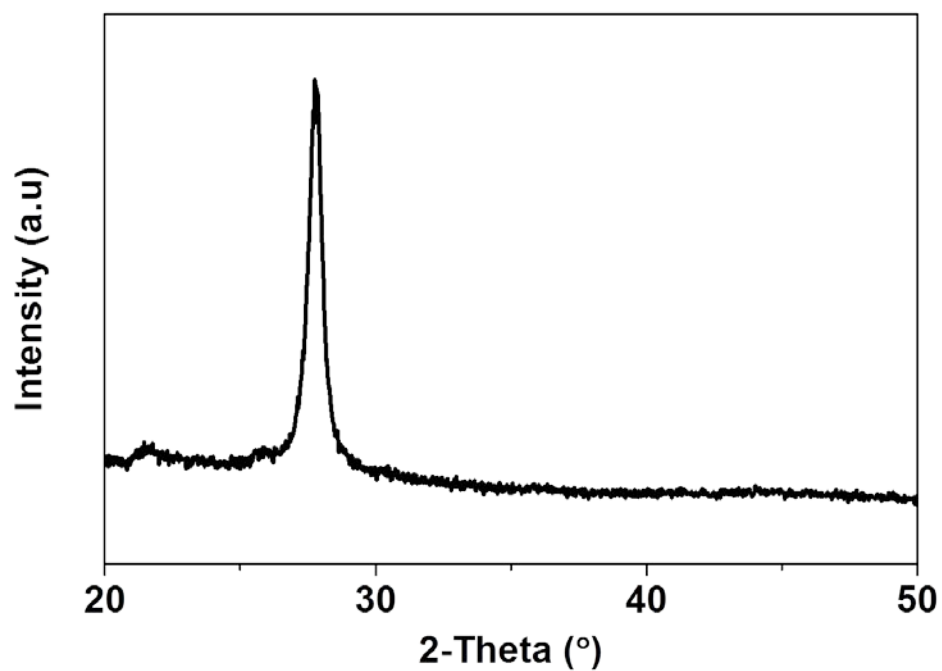

Fig. S3. XRD curve of g-C<sub>3</sub>N<sub>4</sub> obtained at 650 °C for 2 hour.

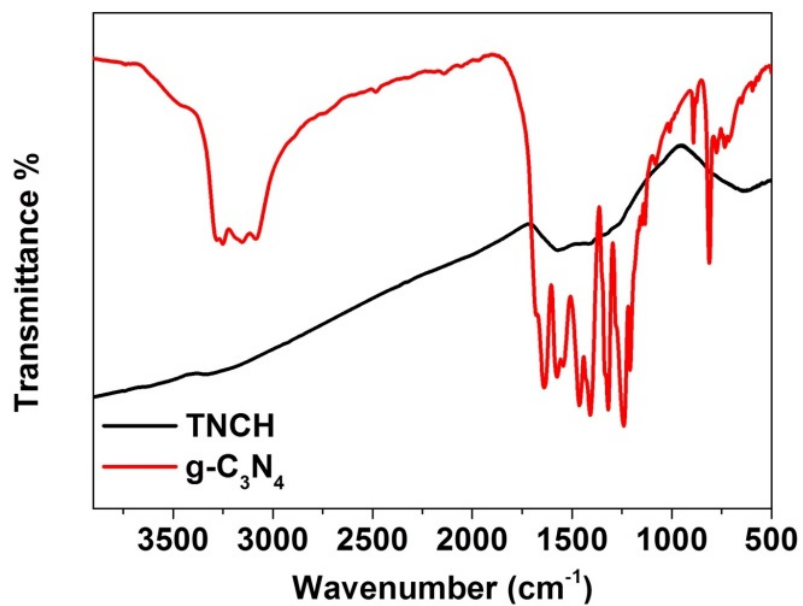

Fig. S4. FTIR spectra of g-C<sub>3</sub>N<sub>4</sub> and TNCHs obtained at 650 °C for 2 hours.

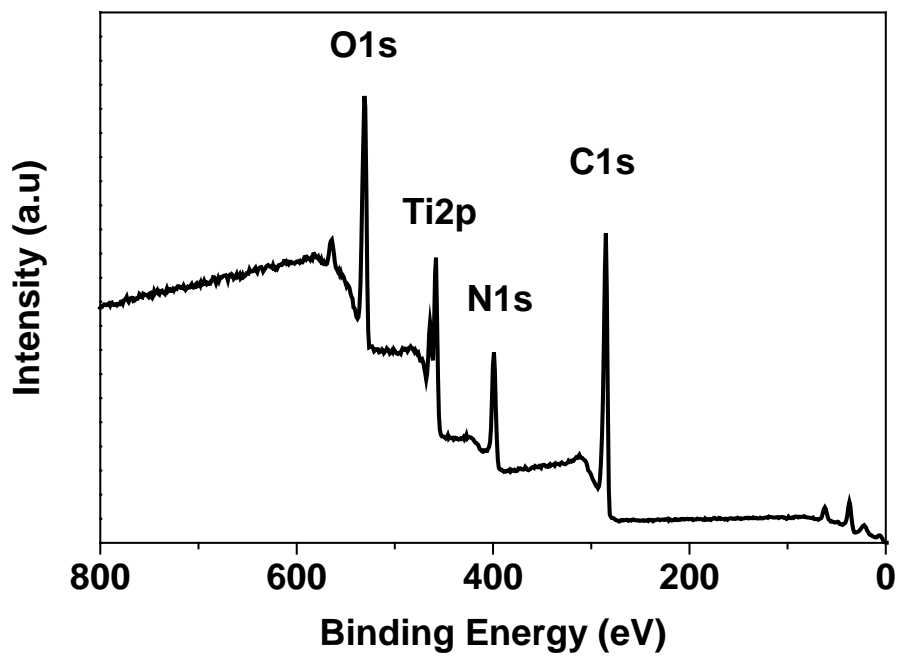

Fig. S5. Full XPS spectrum of amorphous titanate-crosslinking N-rich carbon hybrid.

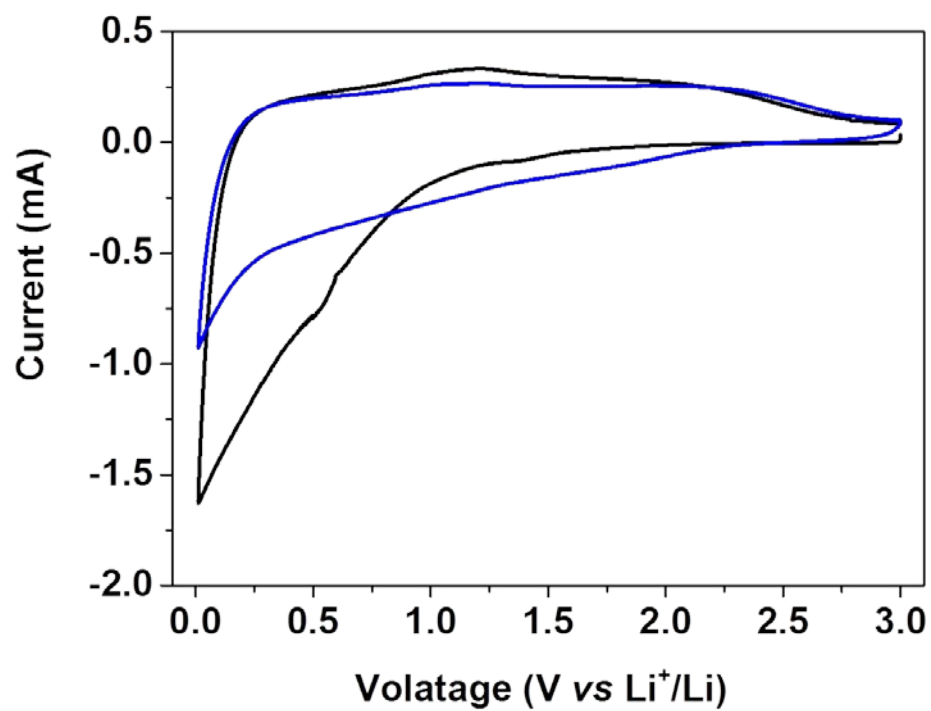

Fig. S6. Cyclic voltammogram of amorphous titanate-crosslinking N-rich carbon hybrid at a scan rate of  $0.2 \text{ mV s}^{-1}$ .
